# Supplementary material for: Dipicolinic Acid-Tb3+/Eu3+ Lanthanide Fluorescence Sensor Array for Rapid and Visual Discrimination of Botanical Origin of Honey
Source: MDPI journal article supplement (doi:10.3390/foods11213388), 2022-10-27
Supplement: s1 [file s1]

# Supplementary Materials

## Dipicolinic acid-Tb<sup>3+</sup>/Eu<sup>3+</sup> lanthanide fluorescence sensor array for rapid and visual discrimination of botanical origin of honey

Xijuan Tu <sup>1,3,4,†</sup>, Yunmin Tao <sup>1,2,†</sup>, Jiaxu Chen <sup>1,3</sup>, Chunping Du <sup>1,3</sup>, Qian Jin <sup>1,3</sup>, Yuchang He <sup>1,3</sup>, Ji Yang <sup>1,3</sup>, Shaokang Huang <sup>1,3</sup>, Wenbin Chen <sup>1,3,4,\*</sup>

<sup>1</sup> College of Bee Science, Fujian Agriculture and Forestry University, Fuzhou 350002, China.

<sup>2</sup> College of Food Science, Fujian Agriculture and Forestry University, Fuzhou 350002, China.

<sup>3</sup> College of Animal Science, Fujian Agriculture and Forestry University, Fuzhou 350002, China.

<sup>4</sup> MOE Engineering Research Center of Bee Products Processing and Application, Fujian Agriculture and Forestry University, Fuzhou 350002, China.

\* Correspondence: wbchen@fafu.edu.cn

† These authors contributed equally to this work.

**Table S1.** Final concentration of ten DPA-Tb<sup>3+</sup>/Eu<sup>3+</sup> complex sensors

| Sensor number | EuCl <sub>3</sub> (μM) | TbCl <sub>3</sub> (μM) | DPA (μM) | Borate buffer (pH / mM) |
|---------------|------------------------|------------------------|----------|-------------------------|
| Sensor#1      | 3.3                    | 1.2                    | 13       | pH 7.4 / 50             |
| Sensor#2      | 3.3                    | 0.8                    | 13       | pH 7.4 / 50             |
| Sensor#3      | 3.3                    | 0.5                    | 13       | pH 7.4 / 50             |
| Sensor#4      | 3.3                    | 0.8                    | 16       | pH 7.4 / 50             |
| Sensor#5      | 3.3                    | 0.8                    | 10       | pH 7.4 / 50             |
| Sensor#6      | 3.3                    | 1.2                    | 13       | pH 8.4 / 50             |
| Sensor#7      | 3.3                    | 0.8                    | 13       | pH 8.4 / 50             |
| Sensor#8      | 3.3                    | 0.5                    | 13       | pH 8.4 / 50             |
| Sensor#9      | 3.3                    | 0.8                    | 16       | pH 8.4 / 50             |
| Sensor#10     | 3.3                    | 0.8                    | 10       | pH 8.4 / 50             |

**Table S2.** Simulated content of eighteen major constituents in honey

| Constituent            | Content in honey                   | Simulated content |
|------------------------|------------------------------------|-------------------|
| Fructose               | 30-45% (w/w) <sup>[1]</sup>        | 40%               |
| Glucose                | 24-40% (w/w) <sup>[1]</sup>        | 30%               |
| Gluconic acid          | 649.0-6475.1 mg/kg <sup>[29]</sup> | 1500 mg/kg        |
| Succinic acid          | 17-187 mg/kg <sup>[30]</sup>       | 150 mg/kg         |
| Citric acid            | 48-351 mg/kg <sup>[30]</sup>       | 150 mg/kg         |
| p-Coumaric acid        | 1.5-11.8 mg/kg <sup>[31]</sup>     | 5 mg/kg           |
| Caffeic acid           | 0.03-2.29 <sup>[32]</sup>          | 5 mg/kg           |
| Vanillic acid          | 0.89-5.91 mg/kg <sup>[31]</sup>    | 5 mg/kg           |
| Kaempferol             | 0.45-3.92 mg/kg <sup>[31]</sup>    | 5 mg/kg           |
| Quercetin              | 0.61-2.43 mg/kg <sup>[31]</sup>    | 5 mg/kg           |
| Vitamin C              | 2.2-2.5 mg/100g <sup>[1]</sup>     | 2.5 mg/100g       |
| Vitamin B <sub>2</sub> | 0.01-0.02 mg/100g <sup>[1]</sup>   | 0.02 mg/100g      |
| Vitamin B <sub>6</sub> | 0.01-0.32 mg/100g <sup>[1]</sup>   | 0.02 mg/100g      |
| Proline                | 229-665 mg/kg <sup>[33]</sup>      | 400 mg/kg         |
| Mg                     | 0.7-13 mg/100g <sup>[1]</sup>      | 10 mg/100g        |
| Zn                     | 0.05-2 mg/100g <sup>[1]</sup>      | 1 mg/100g         |
| Cu                     | 0.02-0.6 mg/100g <sup>[1]</sup>    | 0.2 mg/100g       |
| Mn                     | 0.02-2 mg/100g <sup>[1]</sup>      | 1 mg/100g         |
